# Supplementary material
Source: MDPI journal article supplement (https://www.mdpi.com/2072-4292/15/15/3885)
Supplement: s1 [file s1]

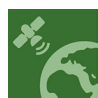**Supplementary Table S1.** *The value of SDG 6 indicators and impact indices in Lincang City and eight counties.*

Table S1.1 The value of SDG 6.1.1 in Lincang City and eight counties (%)

| Region |             | 2015  | 2016  | 2017  | 2018   | 2019   | 2020   |
|--------|-------------|-------|-------|-------|--------|--------|--------|
| City   | Lincang     | 82.44 | 88.21 | 88.80 | 87.45  | 95.28  | 95.54  |
|        | Linxiang    | 85.95 | 93.50 | 94.13 | 72.85  | 91.65  | 91.67  |
|        | Fengqing    | 87.70 | 94.41 | 92.28 | 100.00 | 100.00 | 100.00 |
|        | Gengma      | 87.69 | 88.56 | 94.30 | 93.27  | 98.19  | 100.00 |
| County | Cangyuan    | 73.93 | 83.52 | 92.31 | 83.33  | 84.45  | 98.68  |
|        | Shuangjiang | 64.30 | 81.86 | 93.23 | 92.15  | 99.08  | 99.69  |
|        | Yun         | 82.51 | 81.77 | 94.00 | 98.50  | 98.51  | 98.61  |
|        | Yongde      | 83.44 | 87.63 | 85.14 | 85.17  | 95.67  | 95.24  |
|        | Zhenkang    | 79.77 | 88.32 | 93.48 | 93.22  | 94.97  | 81.40  |

Table S1.2 The value of SDG 6.2.1 in Lincang City and eight counties (places/ km<sup>2</sup>)

| Region |             | 2015 | 2017 | 2020 |
|--------|-------------|------|------|------|
| City   | Lincang     | 0.44 | 3.02 | 4.21 |
|        | Linxiang    | 0.23 | 2.84 | 4.48 |
|        | Fengqing    | 0.30 | 1.26 | 2.22 |
|        | Gengma      | 0.80 | 4.98 | 5.15 |
| County | Cangyuan    | 0.91 | 3.10 | 5.66 |
|        | Shuangjiang | 0.33 | 4.81 | 7.40 |
|        | Yun         | 0.31 | 2.33 | 2.60 |
|        | Yongde      | 0.76 | 3.98 | 4.11 |
|        | Zhenkang    | 1.04 | 5.22 | 5.74 |

Table S1.3 The value of SDG 6.3.1 in Lincang City and eight counties (%)

| Region |             | 2015  | 2016  | 2017  | 2018   | 2019   | 2020   |
|--------|-------------|-------|-------|-------|--------|--------|--------|
| City   | Lincang     | 79.23 | 88.49 | 91.00 | 93.02  | 94.57  | 99.17  |
|        | Linxiang    | 77.04 | 92.04 | 96.04 | 91.40  | 96.10  | 99.16  |
|        | Fengqing    | 64.11 | 86.00 | 86.46 | 100.00 | 100.00 | 100.00 |
|        | Gengma      | 92.16 | 86.18 | 90.54 | 91.20  | 91.43  | 100.00 |
| County | Cangyuan    | 88.89 | 88.64 | 90.79 | 100.00 | 99.69  | 100.00 |
|        | Shuangjiang | 96.02 | 88.57 | 92.45 | 95.12  | 96.61  | 99.14  |
|        | Yun         | 85.60 | 88.01 | 85.74 | 88.20  | 88.50  | 98.00  |
|        | Yongde      | 80.24 | 83.23 | 85.90 | 87.27  | 87.53  | 97.60  |
|        | Zhenkang    | 85.89 | 88.89 | 93.02 | 94.18  | 95.11  | 99.30  |

Table S1.4 The value of SDG 6.3.2 in Lincang City and eight counties (%)

| Region |          | 2015 | 2016 | 2017 | 2018 | 2019 | 2020 |
|--------|----------|------|------|------|------|------|------|
| City   | Lincang  | 100  | 100  | 100  | 100  | 100  | 100  |
|        | Linxiang | 100  | 100  | 100  | 100  | 100  | 100  |
| County | Fengqing | 100  | 100  | 100  | 100  | 100  | 100  |
|        | Gengma   | 100  | 100  | 100  | 100  | 100  | 100  |
|        | Cangyuan | 100  | 100  | 100  | 100  | 100  | 100  |

| Region |             | 2015 | 2016 | 2017 | 2018 | 2019 | 2020 |
|--------|-------------|------|------|------|------|------|------|
|        | Shuangjiang | 100  | 100  | 100  | 100  | 100  | 100  |
|        | Yun         | 100  | 100  | 100  | 100  | 100  | 100  |
|        | Yongde      | 100  | 100  | 100  | 100  | 100  | 100  |
|        | Zhenkang    | 100  | 100  | 100  | 100  | 100  | 100  |

Table S1.5 The value of SDG 6.4.1 in Lincang City and eight counties (%)

| Region |             | 2015  | 2016  | 2017   | 2018  | 2019  | 2020   |
|--------|-------------|-------|-------|--------|-------|-------|--------|
| City   | Lincang     | 4.78  | 18.05 | -12.12 | 1.18  | 12.06 | 1.33   |
|        | Linxiang    | -2.72 | 53.68 | -16.20 | -4.19 | 42.82 | -14.77 |
|        | Fengqing    | -0.60 | 16.77 | -12.32 | 8.66  | 2.01  | 4.01   |
|        | Gengma      | 14.20 | 16.19 | -6.64  | -0.76 | 4.23  | 18.63  |
| County | Cangyuan    | 6.74  | 19.15 | -18.41 | 6.58  | 5.56  | -16.07 |
|        | Shuangjiang | 5.60  | 10.66 | -7.99  | -1.64 | 11.91 | 1.89   |
|        | Yun         | 4.48  | 10.19 | -19.34 | -1.66 | 13.10 | 5.05   |
|        | Yongde      | -3.61 | 8.29  | -11.72 | 2.05  | 8.07  | 5.91   |
|        | Zhenkang    | 17.13 | 33.08 | -7.32  | 3.04  | -1.74 | 2.41   |

Table S1.6 The value of SDG 6.4.2 in Lincang City and eight counties (%)

| Region |             | 2015  | 2016 | 2017  | 2018 | 2019  | 2020 |
|--------|-------------|-------|------|-------|------|-------|------|
| City   | Lincang     | 7.60  | 4.84 | 5.84  | 5.37 | 9.13  | 6.37 |
|        | Linxiang    | 6.72  | 3.86 | 4.26  | 4.91 | 9.55  | 6.86 |
|        | Fengqing    | 11.02 | 6.62 | 10.17 | 9.07 | 14.95 | 9.93 |
|        | Gengma      | 5.70  | 3.70 | 3.95  | 3.52 | 6.58  | 4.08 |
| County | Cangyuan    | 5.00  | 3.61 | 4.04  | 3.31 | 4.55  | 4.44 |
|        | Shuangjiang | 8.89  | 6.70 | 7.40  | 7.62 | 15.29 | 9.84 |
|        | Yun         | 9.19  | 5.90 | 8.27  | 7.97 | 14.25 | 8.71 |
|        | Yongde      | 8.71  | 5.81 | 6.67  | 6.45 | 11.61 | 7.79 |
|        | Zhenkang    | 6.74  | 3.36 | 4.07  | 3.22 | 4.97  | 3.54 |

Table S1.7 The value of SDG 6.6.1 in Lincang City and eight counties (%)

| Region |             | 2010-2015 | 2015-2018 | 2018-2020 |
|--------|-------------|-----------|-----------|-----------|
| City   | Lincang     | 109.48    | 1.49      | 18.87     |
|        | Linxiang    | 5.06      | 3.35      | 41.81     |
|        | Fengqing    | 1182.33   | 0.72      | 2.88      |
|        | Gengma      | 2.95      | -2.08     | 2.92      |
| County | Cangyuan    | 4.76      | 1.34      | 54.72     |
|        | Shuangjiang | 107.68    | 5.33      | 2.51      |
|        | Yun         | -12.02    | 1.18      | 86.79     |
|        | Yongde      | 18.02     | 4.59      | 2.68      |
|        | Zhenkang    | 9.10      | 2.57      | 196.02    |

Table S1.8 The consumption of water resources in Lincang City and eight counties (hundred million cubic metres)

| Region |         | Indicator               | 2015 | 2016 | 2017 | 2018 | 2019 | 2020 |
|--------|---------|-------------------------|------|------|------|------|------|------|
| City   | Lincang | Total water consumption | 9.28 | 7.83 | 8.61 | 8.40 | 8.45 | 8.59 |
|        |         | Primary industry        | 7.74 | 6.38 | 7.12 | 6.80 | 6.80 | 7.11 |
|        |         | Secondary industry      | 0.55 | 0.49 | 0.50 | 0.58 | 0.59 | 0.51 |

| Region |             | Indicator               | 2015 | 2016 | 2017 | 2018 | 2019 | 2020 |
|--------|-------------|-------------------------|------|------|------|------|------|------|
| County | Linxiang    | Tertiary industry       | 0.93 | 0.89 | 0.91 | 0.94 | 0.90 | 0.84 |
|        |             | Total water consumption | 0.99 | 0.63 | 0.74 | 0.77 | 0.73 | 0.87 |
|        |             | Primary industry        | 0.73 | 0.39 | 0.47 | 0.48 | 0.44 | 0.60 |
|        |             | Secondary industry      | 0.10 | 0.12 | 0.13 | 0.13 | 0.14 | 0.10 |
|        |             | Tertiary industry       | 0.15 | 0.12 | 0.13 | 0.14 | 0.13 | 0.14 |
|        |             | Total water consumption | 1.69 | 1.44 | 1.64 | 1.50 | 1.51 | 1.54 |
|        | Fengqing    | Primary industry        | 1.46 | 1.23 | 1.40 | 1.24 | 1.29 | 1.34 |
|        |             | Secondary industry      | 0.06 | 0.03 | 0.05 | 0.08 | 0.05 | 0.05 |
|        |             | Tertiary industry       | 0.17 | 0.17 | 0.17 | 0.17 | 0.17 | 0.13 |
|        |             | Total water consumption | 1.21 | 1.05 | 1.13 | 1.09 | 1.14 | 0.99 |
|        | Gengma      | Primary industry        | 1.02 | 0.86 | 0.93 | 0.88 | 0.91 | 0.78 |
|        |             | Secondary industry      | 0.07 | 0.07 | 0.07 | 0.08 | 0.09 | 0.08 |
|        |             | Tertiary industry       | 0.12 | 0.12 | 0.11 | 0.12 | 0.12 | 0.12 |
|        |             | Total water consumption | 0.81 | 0.68 | 0.75 | 0.70 | 0.69 | 0.86 |
|        | Cangyuan    | Primary industry        | 0.72 | 0.58 | 0.65 | 0.59 | 0.58 | 0.77 |
|        |             | Secondary industry      | 0.02 | 0.03 | 0.03 | 0.04 | 0.04 | 0.02 |
|        |             | Tertiary industry       | 0.07 | 0.06 | 0.07 | 0.07 | 0.07 | 0.07 |
|        |             | Total water consumption | 0.96 | 0.86 | 0.94 | 0.95 | 0.97 | 0.99 |
|        | Shuangjiang | Primary industry        | 0.83 | 0.74 | 0.82 | 0.82 | 0.83 | 0.87 |
|        |             | Secondary industry      | 0.06 | 0.05 | 0.05 | 0.06 | 0.06 | 0.05 |
|        |             | Tertiary industry       | 0.07 | 0.07 | 0.07 | 0.07 | 0.07 | 0.06 |
|        |             | Total water consumption | 1.53 | 1.35 | 1.51 | 1.53 | 1.49 | 1.44 |
|        | Yun         | Primary industry        | 1.24 | 1.09 | 1.25 | 1.25 | 1.14 | 1.14 |
|        |             | Secondary industry      | 0.11 | 0.09 | 0.08 | 0.09 | 0.09 | 0.09 |
|        |             | Tertiary industry       | 0.17 | 0.17 | 0.17 | 0.18 | 0.17 | 0.15 |
|        |             | Total water consumption | 1.13 | 1.09 | 1.14 | 1.12 | 1.15 | 1.13 |
|        | Yongde      | Primary industry        | 0.95 | 0.90 | 0.97 | 0.93 | 0.97 | 0.96 |
|        |             | Secondary industry      | 0.05 | 0.05 | 0.04 | 0.05 | 0.05 | 0.05 |
|        |             | Tertiary industry       | 0.12 | 0.13 | 0.12 | 0.13 | 0.12 | 0.11 |
|        |             | Total water consumption | 0.96 | 0.73 | 0.77 | 0.74 | 0.78 | 0.79 |
|        | Zhenkang    | Primary industry        | 0.80 | 0.60 | 0.64 | 0.60 | 0.64 | 0.65 |
|        |             | Secondary industry      | 0.08 | 0.06 | 0.06 | 0.07 | 0.07 | 0.07 |
|        |             | Tertiary industry       | 0.07 | 0.06 | 0.06 | 0.07 | 0.07 | 0.07 |

Table S1.9 The scale of the total resident population in Lincang City and eight counties

| Region |             | 2015   | 2016   | 2017   | 2018   | 2019   | 2020   |
|--------|-------------|--------|--------|--------|--------|--------|--------|
| City   | Lincang     | 250.90 | 252.00 | 252.60 | 253.60 | 253.80 | 225.80 |
|        | Linxiang    | 32.00  | 33.65  | 33.75  | 33.95  | 33.98  | 37.10  |
| County | Fengqing    | 44.00  | 47.32  | 47.36  | 47.50  | 47.50  | 38.54  |
|        | Gengma      | 29.00  | 30.78  | 30.87  | 30.95  | 30.96  | 28.57  |
|        | Cangyuan    | 16.99  | 16.81  | 16.64  | 16.44  | 16.23  | 16.02  |
|        | Shuangjiang | 17.00  | 18.42  | 18.46  | 18.56  | 18.57  | 16.47  |
|        | Yun         | 44.00  | 46.43  | 46.53  | 46.67  | 46.68  | 38.92  |
|        |             |        |        |        |        |        |        |

|  |          |       |       |       |       |       |       |
|--|----------|-------|-------|-------|-------|-------|-------|
|  | Yongde   | 29.00 | 38.21 | 38.31 | 38.41 | 38.42 | 32.89 |
|  | Zhenkang | 18.00 | 18.41 | 18.47 | 18.57 | 18.71 | 17.29 |

Table S1.10 The water-use efficiency in Lincang City and eight counties (RMB/ m<sup>3</sup>)

| Region      | Indicator          | 2015   | 2016   | 2017   | 2018   | 2019   | 2020   |
|-------------|--------------------|--------|--------|--------|--------|--------|--------|
| City        | Primary industry   | 6.76   | 8.28   | 7.41   | 7.95   | 9.15   | 9.60   |
|             | Secondary industry | 273.77 | 296.21 | 266.99 | 230.79 | 192.86 | 228.73 |
|             | Tertiary industry  | 183.25 | 194.43 | 189.67 | 177.37 | 243.52 | 266.25 |
| Linxiang    | Primary industry   | 7.26   | 13.81  | 11.35  | 11.37  | 14.30  | 11.50  |
|             | Secondary industry | 255.10 | 216.14 | 185.41 | 184.65 | 133.80 | 184.00 |
|             | Tertiary industry  | 290.77 | 355.59 | 324.02 | 289.95 | 529.37 | 493.24 |
| Fengqing    | Primary industry   | 8.26   | 9.87   | 8.59   | 9.94   | 11.00  | 11.51  |
|             | Secondary industry | 422.06 | 838.16 | 493.65 | 322.07 | 391.06 | 427.97 |
|             | Tertiary industry  | 158.28 | 153.74 | 151.52 | 152.40 | 185.36 | 237.53 |
| Gengma      | Primary industry   | 9.73   | 11.62  | 10.65  | 11.49  | 12.69  | 16.27  |
|             | Secondary industry | 274.25 | 289.77 | 284.70 | 244.80 | 181.26 | 203.28 |
|             | Tertiary industry  | 188.83 | 196.16 | 203.48 | 178.34 | 225.72 | 231.48 |
| Cangyuan    | Primary industry   | 4.49   | 5.61   | 5.12   | 5.80   | 6.81   | 5.67   |
|             | Secondary industry | 502.99 | 293.54 | 247.62 | 206.90 | 185.39 | 372.59 |
|             | Tertiary industry  | 175.49 | 198.87 | 186.73 | 173.77 | 181.76 | 187.35 |
| Shuangjiang | Primary industry   | 4.32   | 4.87   | 4.42   | 4.58   | 5.20   | 5.48   |
|             | Secondary industry | 170.75 | 217.21 | 208.90 | 177.79 | 141.63 | 174.68 |
|             | Tertiary industry  | 179.01 | 174.57 | 177.14 | 169.60 | 246.75 | 261.86 |
| Yun         | Primary industry   | 7.91   | 9.15   | 7.92   | 8.07   | 10.18  | 11.20  |
|             | Secondary industry | 305.95 | 364.42 | 312.23 | 266.18 | 222.93 | 228.15 |
|             | Tertiary industry  | 136.33 | 142.64 | 138.62 | 132.94 | 172.95 | 202.08 |
| Yongde      | Primary industry   | 5.75   | 6.07   | 5.70   | 6.01   | 6.65   | 7.41   |
|             | Secondary industry | 294.95 | 272.41 | 289.07 | 267.95 | 239.99 | 254.13 |
|             | Tertiary industry  | 141.16 | 155.68 | 149.74 | 137.60 | 184.38 | 213.98 |
| Zhenkang    | Primary industry   | 3.78   | 5.13   | 4.90   | 5.35   | 5.88   | 6.35   |
|             | Secondary industry | 137.41 | 170.53 | 160.29 | 142.72 | 130.76 | 133.43 |
|             | Tertiary industry  | 200.87 | 226.92 | 225.85 | 221.47 | 232.09 | 240.97 |

Table S1.11 The scale of GDP per capita in Lincang City and eight counties (RMB)

| Region |             | 2015  | 2016  | 2017  | 2018  | 2019  | 2020  |
|--------|-------------|-------|-------|-------|-------|-------|-------|
| City   | Lincang     | 20077 | 21906 | 23942 | 24892 | 29926 | 32358 |
|        | Linxiang    | 27627 | 29685 | 32775 | 43512 | 47939 | 46188 |
|        | Fengqing    | 19307 | 20992 | 22733 | 24347 | 27882 | 37857 |
| County | Gengma      | 24060 | 26355 | 29169 | 31546 | 35904 | 42236 |
|        | Cangyuan    | 18288 | 19911 | 22268 | 22146 | 25124 | 31982 |
|        | Shuangjiang | 19427 | 20972 | 23037 | 26674 | 29740 | 36029 |
|        | Yun         | 19643 | 21091 | 22810 | 22840 | 25949 | 33410 |
|        | Yongde      | 13995 | 16414 | 17768 | 20023 | 19911 | 25151 |
|        | Zhenkang    | 19286 | 21317 | 23777 | 24869 | 28031 | 32707 |

**Supplementary Method S2.** *The method of calculating SDG 6 seven indicators in Lincang City and eight counties.*

(1) The SDG 6.1.1 (the proportion of population using safely managed drinking water services) is reflected by the water quality standard rate of centralized drinking water sources, the rate of water penetration, and the extent and timing of the impact of drinking water safety events. Based on Lincang City water resources bulletin, the water quality standard rate is 100%, and there were no water pollution events in the region during the study period, so the water use prevalence rate in the statistical yearbook is used to reflect the progress of SDG 6.1.1.

(2) Public toilet is a crucial part of urban sanitation systems and a key indicator of a region's ecological civilization. SDG 6.2.1 (proportion of population using (a) safely managed sanitation services and (b) a hand-washing facility with soap and water) was estimated by the density of public toilets in urban regions, which is calculated by the ratio of public toilets number to urban built-up area.

(3) The SDG 6.3.1 (Proportion of domestic and industrial wastewater flows safely treated) data is derived from the percentage of wastewater safely treated from the Statistical Yearbook or the sewage treatment rate from the Housing and Building Department.

(4) The SDG 6.3.2 (Proportion of bodies of water with good ambient water quality) data derived from the water quality compliance rate of water functional zones and potable water sources in Lincang City's Bulletin of Environmental Status.

(5) The SDG 6.4.1 (Change in water-use efficiency over time) calculation references the UN's Metadata for SDG Indicators accounting method, the formula is as follows:

$$CWUE = \frac{WUE_t - WUE_{t-1}}{WUE_{t-1}} \times 100$$

$$WUE = A_{we} \times P_A + M_{we} \times P_M + S_{we} \times P_S$$

$$A_{we} = \frac{GVA_\alpha \times (1 - C_\gamma)}{V_\alpha}$$

$$C_\gamma = \frac{1}{1 + \frac{A_i}{(1 - A_i) * 0.375}}$$

$$M_{we} = \frac{GVA_m}{V_m}$$

$$S_{we} = \frac{GVA_s}{V_s}$$

$CWUE$  is the change in water-use efficiency over time,  $WUE$  is water-use efficiency,  $WUE_t$ ,  $WUE_{t-1}$  are water-use efficiency in time  $t$  and time  $t-1$  respectively;  $A_{we}, M_{we}, S_{we}$  are irrigated agricultural water-use efficiency(USD/m<sup>3</sup>), mimec water-use efficiency(USD/m<sup>3</sup>), and services water-use efficiency(USD/m<sup>3</sup>), respectively;  $P_A, P_M, P_S$  are the proportion of agricultural sector water use, mimec sector water use and service sector water use, respectively;  $GVA_\alpha, GVA_m, GVA_s$  are the Gross value added by agriculture (excluding river and marine fisheries and forestry)(USD), mimec sector and service sector, respectively;  $C_\gamma$  is the proportion of agricultural GVA produced by rainfed agriculture;  $V_\alpha, V_m, V_s$  are the volume of water used by the agricultural sector (including irrigation, livestock and aquaculture) (m<sup>3</sup>), mimec sector and service sector, respectively;  $A_i$  is the proportion of irrigated land on the total cultivated land. Furthermore, to compare water use efficiency from year to year, the GDP of the corresponding industries must be transformed and uniformly converted to the comparable prices of the base period, using the agricultural price index, the industrial product price index, and the consumer index. According to the UN Water and FAO step-by-step monitoring methodology, the conversion between rain-fed and irrigated agriculture is computed using a default production ratio of 0.375.

(6) The SDG 6.4.2 (level of water stress) is the proportion of freshwater withdrawal to available freshwater resources. the formula is as follows:

$$Stress = \frac{TWW}{TRWR - Env} \times 100$$

Where:

*Stress* is the level of water stress (%); *TWW* is the total freshwater withdrawn; *TRWR* is the total renewable freshwater resources; *Env* is the environmental water requirements ( $10^9 \text{ m}^3/\text{year}$ ).

(7) The SDG 6.6.1 (Change in the extent of water-related ecosystems over time) refers to the rate of change in water-related ecosystems, the area of water-related ecosystems is extracted with rivers, lakes, reservoirs and wetlands from the resource and environmental science and data center (CRESO). This methodology uses 2010-2015 as the 5-year baseline period and to be compared against with 2015-2018, 2018-2020. Gains or loss in water-related ecosystems area can be beneficial or detrimental, and their impacts must be situated to local conditions.
